# Supplementary material for: Anisotropic photoresponse of layered 2D SnS-based near infrared photodetectors
Source: Royal Society of Chemistry journal article supplement (doi:10.1039/c7tc02865b), 2017-01-01
Supplement: c7tc02865b1.pdf [file c7tc02865b1.pdf]

Electronic Supplementary Material (ESI).

This journal is © The Royal Society of Chemistry 2017

## **Anisotropic photoresponse of layered 2D SnS-based near infrared photodetectors**

Zidong Zhang,<sup>a,b</sup> Juehan Yang,<sup>b</sup> kai zhang,<sup>b,c</sup> Shuai Chen,<sup>b</sup> Fuhong Mei<sup>\*a</sup> and Guozhen Shen<sup>\*bc</sup>

<sup>a</sup> Key Laboratory of Interface Science and Engineering in Advanced materials of Ministry of Education and Research Center of Advanced Materials Science and Technology, Taiyuan University of Technology, Taiyuan 030024, China. \*E-mail: jackie\_mei@163.com.

<sup>b</sup> State Key Laboratory for Superlattices and Microstructures, Institute of Semiconductors, Chinese Academy of Sciences, Beijing 100083, China. \*E-mail: gzshen@semi.ac.cn.

<sup>c</sup> College of Materials Science and Opto-electronic Technology, University of Chinese Academy of Sciences, Beijing 100029, China

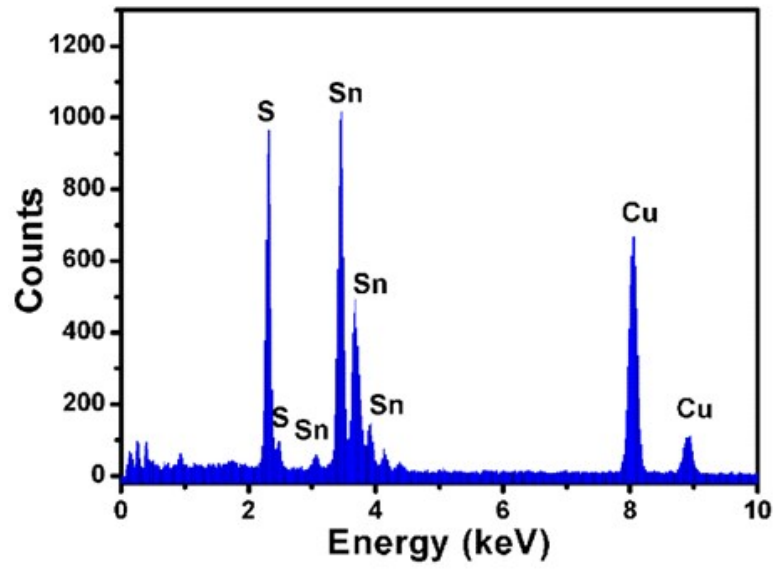

Figure S1. EDX spectrum recorded from the SnS nanosheets.

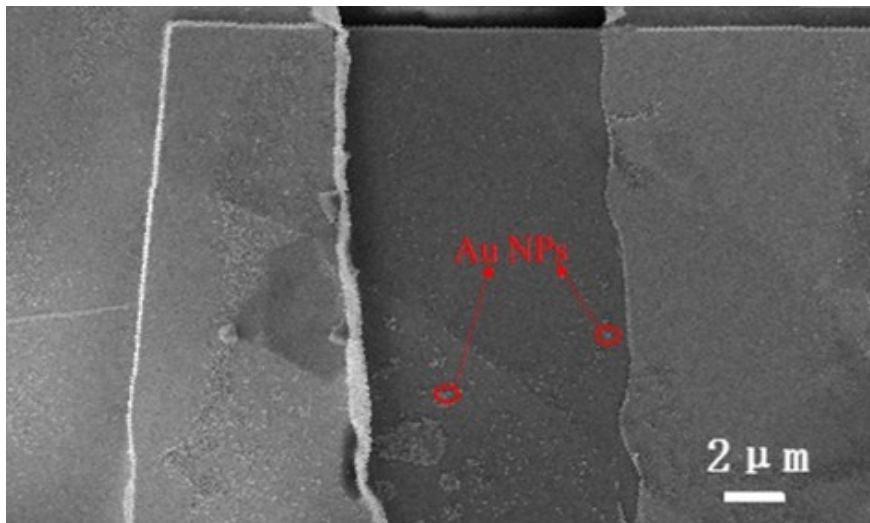

Figure S2. Au nanoparticles decorated the SnS nanosheet photodetector to form hybrid device.
